# Supplementary material
Source: PubMed Central journal article supplement (PMC8898742)
Supplement: mmc1.pdf [file mmc1.pdf]

**Supplemental information**

**Cross-species tropism and antigenic  
landscapes of circulating SARS-CoV-2 variants**

**Yali Zhang, Min Wei, Yangtao Wu, Juan Wang, Yuting Hong, Yang Huang, Lunzhi Yuan, Jian Ma, Kai Wang, Shaojuan Wang, Yang Shi, Zikang Wang, Huilin Guo, Jin Xiao, Chuanlai Yang, Jianghui Ye, Jijing Chen, Yuxi Liu, Baorong Fu, Miaolin Lan, Peixuan Gong, Zehong Huang, Yingying Su, Yixin Chen, Tianying Zhang, Jun Zhang, Huachen Zhu, Hai Yu, Quan Yuan, Tong Cheng, Yi Guan, and Ningshao Xia**

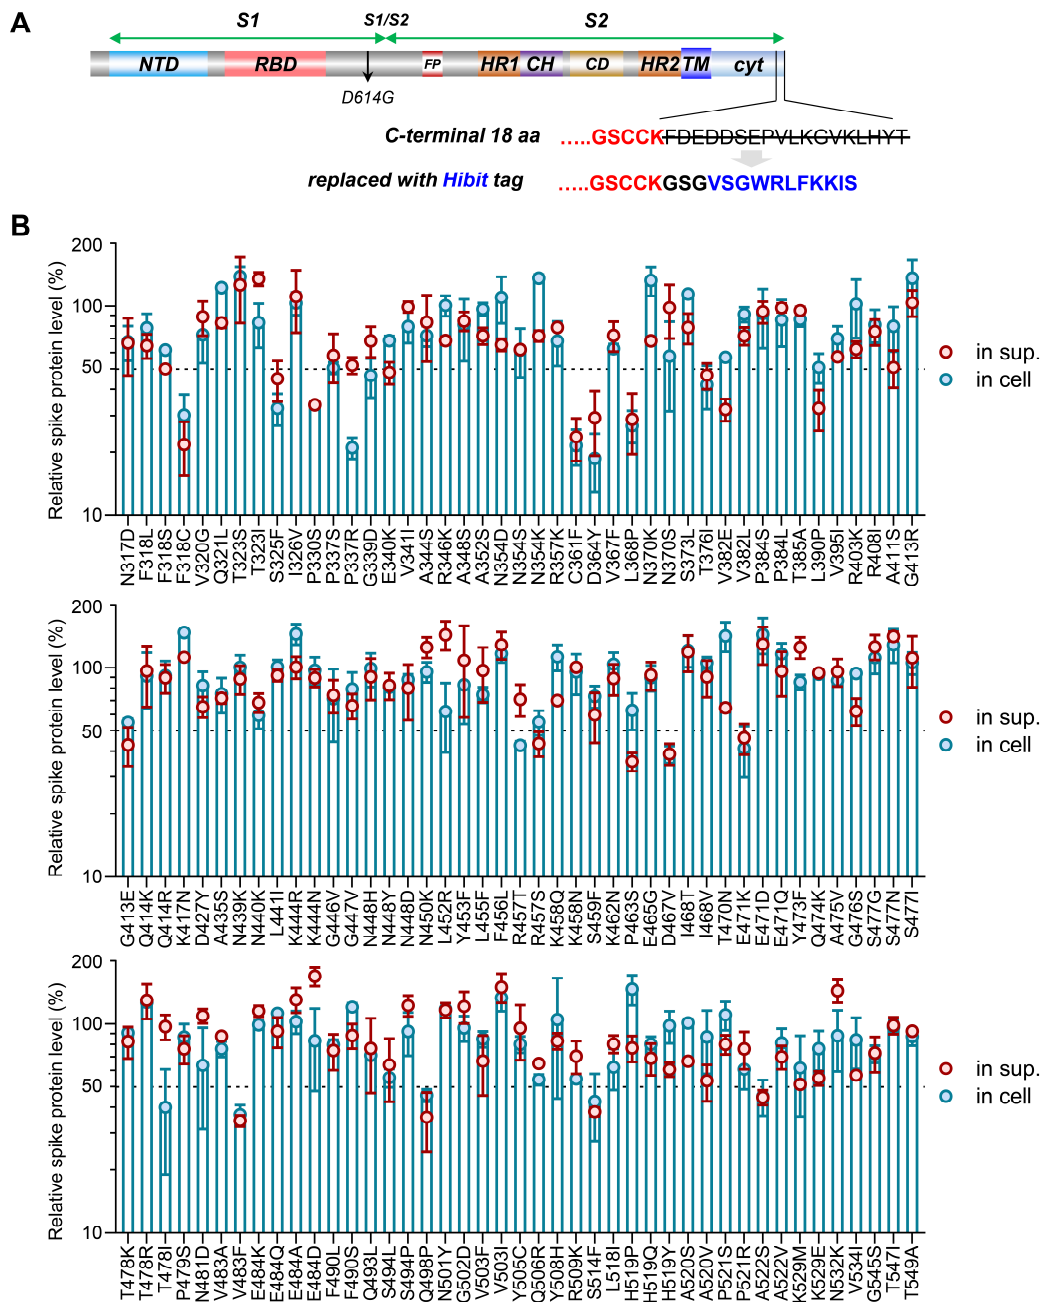

**Figure S1. The productions and secretions of RBD mutants in 293T cells. Related to Figure 1. (A)** Schematics of the spike variant-expressing cassette used in this study. The 18aa from the C-terminus of the spike was replaced with a HiBit bioluminescent tag for detection. **(B)** Changes of RBD mutants in spike production and secretion relative to S-614G control (%) in 293T cells. Extracellular and intracellular spike protein levels were detected by using Nano-Glo® HiBiT luminescent detection system. For each mutant, three technical replicates were performed. Data are plotted as the mean±SD. In sup. spike

protein level relative to S-614G in supernatants; in cell, spike protein level relative to S-614G in cell lysates. Seventeen mutants (F318C, S325F, P330S, P337R, G339D, C361F, D364Y, L368P, T376I, R457T, D467V, E471K, T478I, V483F, Q498P, S514F, A322S) present averagely >50% decreased spike-production (according to the relative spike levels in cell lysates). Seven mutants (N354D, N354K, N370K, K444R, K458Q, T470N, H519P) have notably decreased spike secretions (d-value between cell lysates and supernatants >40%).

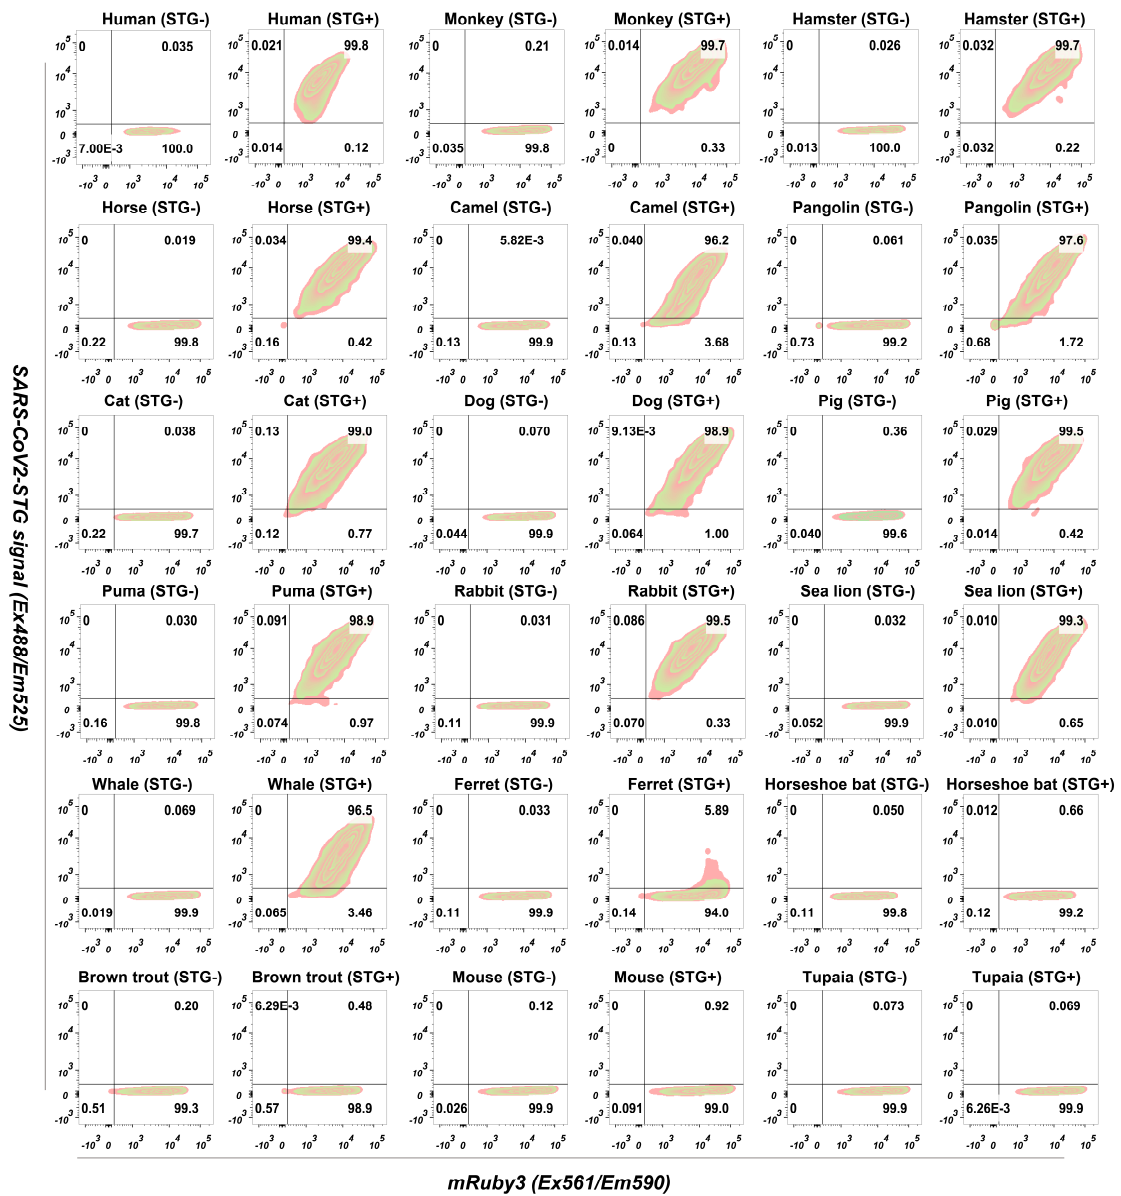

**Figure S2. Flow cytometry analyses of H1299 cells expressing ACE2 orthologs of 18 species. Related to Figures 1 and 2. STG+, ACE2-expressing cells were pre-incubated (1 hour) with SARS-CoV2-STG probe; STG-, ACE2-expressing cells in the absence of SARS-CoV2-STG probe.**



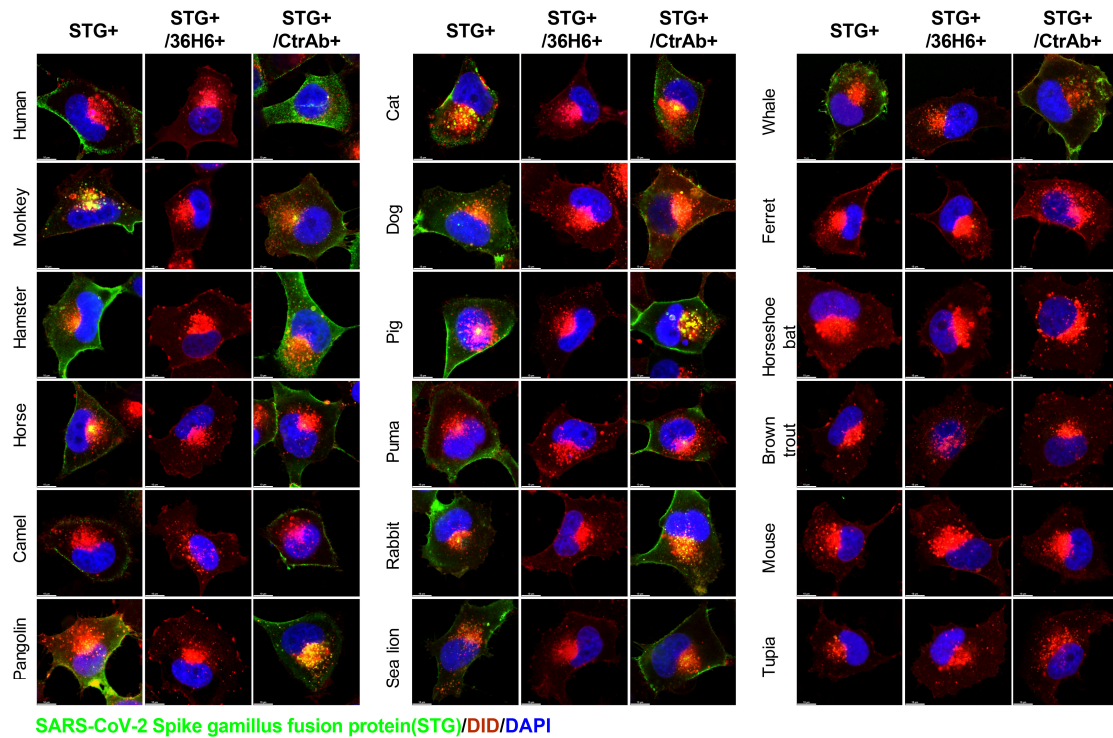

**Figure S3. Fluorescence confocal images of ACE2-expressing cells incubated with SARS-CoV2-STG probe. Related to Figures 1 and 2.** The SARS-CoV2-STG probe was used at 2.5 nM. STG+, cells were incubated (1 hour) with SARS-CoV2-STG probe; STG+/36H6+, cells were incubated with SARS-CoV2-STG in the presence of 36H6 mAb (a mAb can block the interaction between RBD and ACE2). STG+/CtrAb+, cells were incubated with SARS-CoV2-STG in the presence of a control mAb. DID, Membrane labeling DiD dye; DAPI, 4',6-diamidino-2-phenylindole, DNA stain. The scale bar is 10  $\mu$ m.

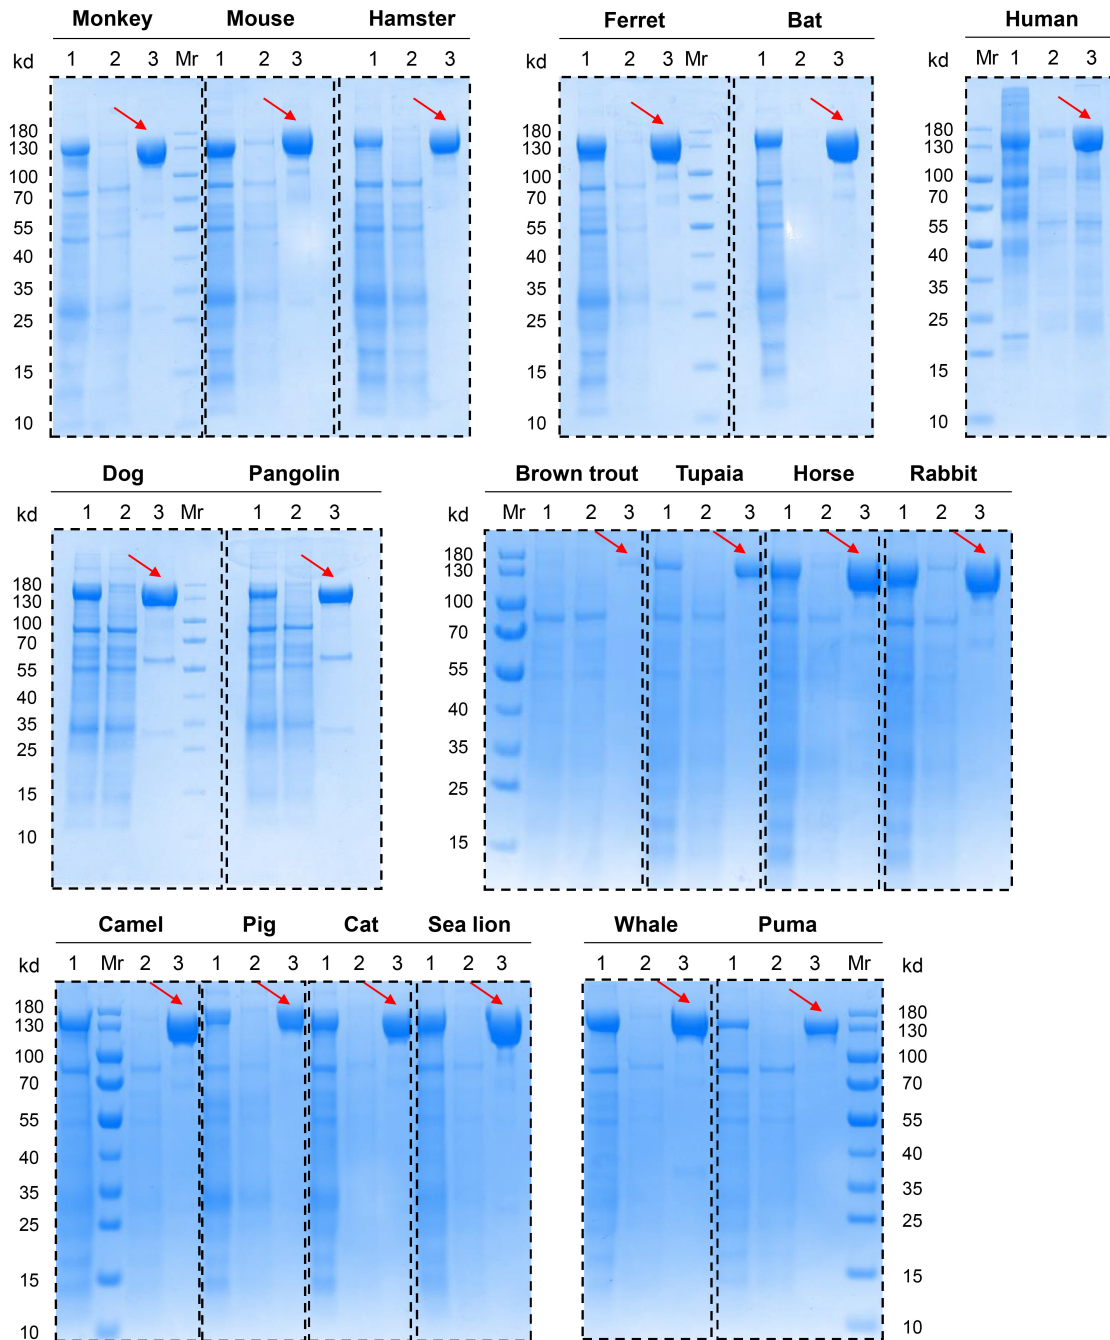

**Figure S4. SDS-PAGE analyses of rACE2 proteins of various species. Related to Figures 1 and 3.** lane 1, supernatants of transfected cells; lane 2, supernatants after flowing through MabSelect SuRe resin; lane 3, citrate buffer-eluted proteins; Mr, protein markers.



RBD mutants in cells expressing 15 ACE2 orthologs, related to Figure 2A. **(D)** Comparison of the infectivities of VOC/VOI LVpp in cells expressing ACE2 orthologs of tupaia (left panel) or brown trout (right panel). Related to Figure 2C. Although some significant differences were noted for some variants in the two cells, markedly improved infection performance of variants was observed in neither tuACE2- nor btACE2-H1299 cells, suggesting the two ACE2 orthologs were still ineffective to support infection of these variants.

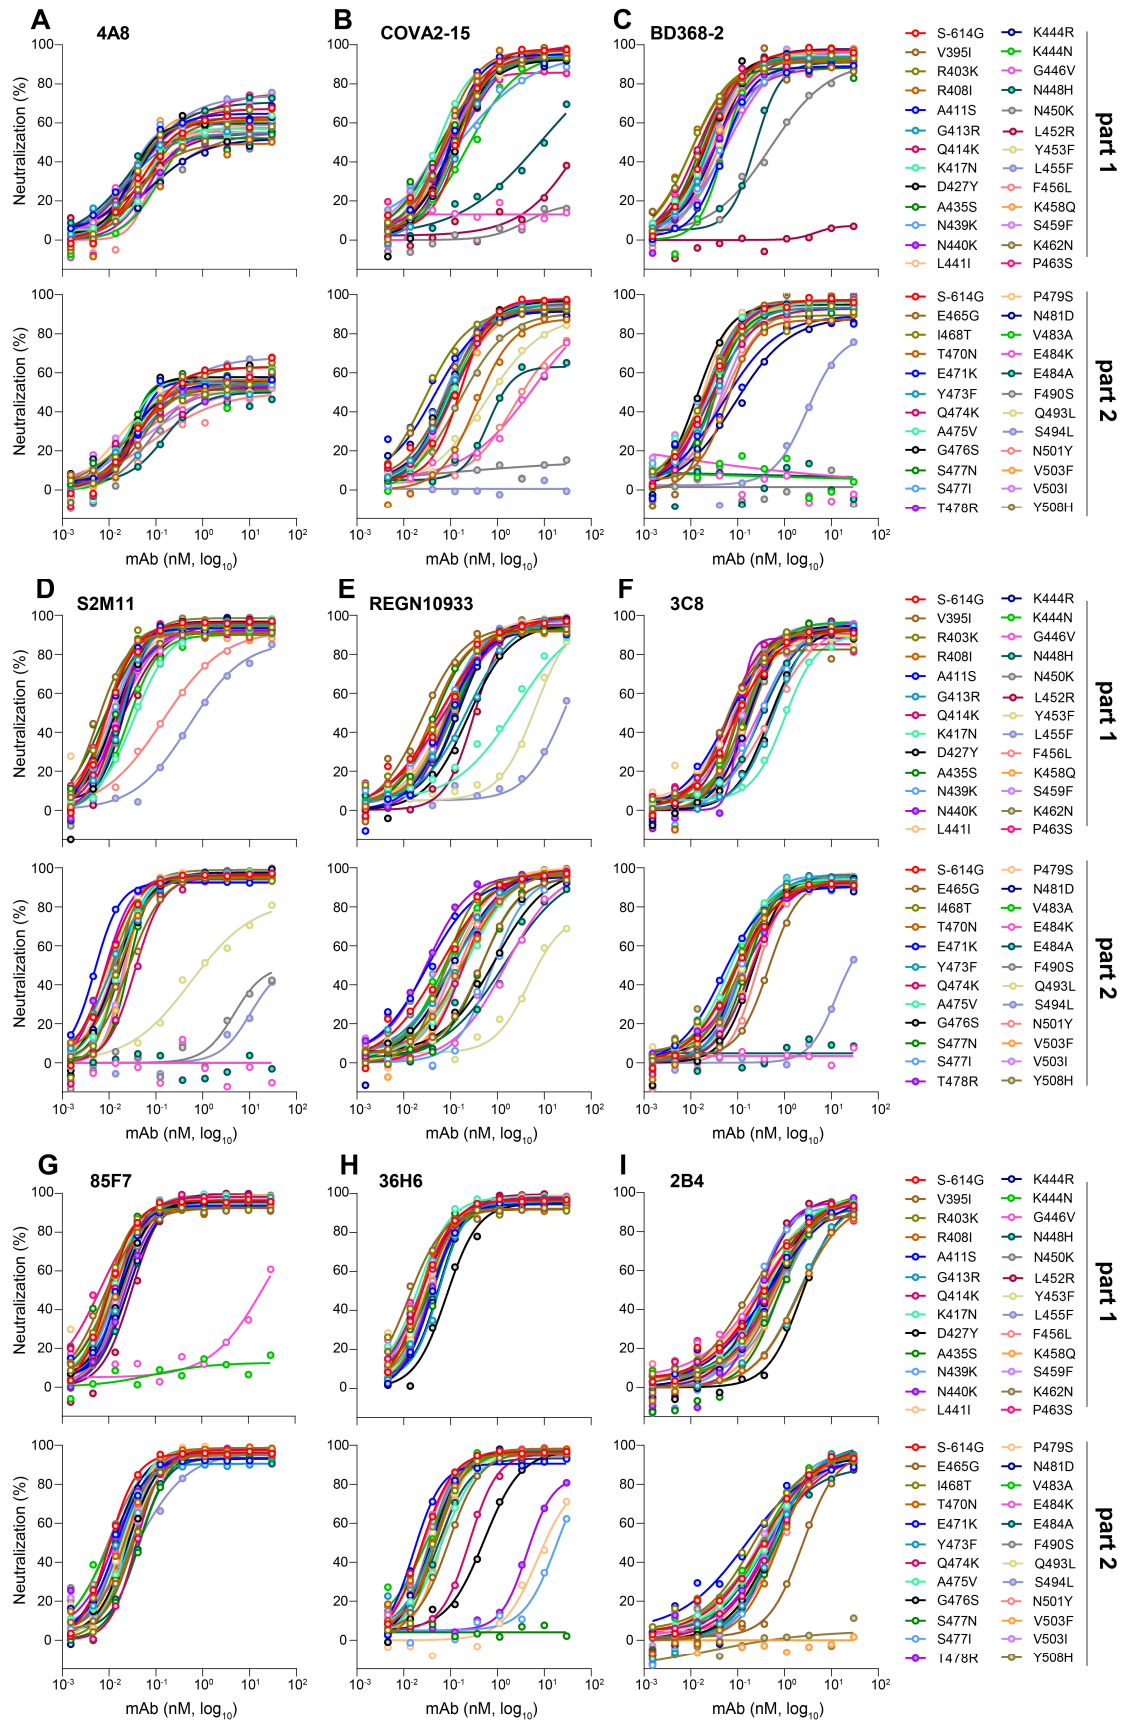

**Figure S6. Neutralization profiles for 9 mAbs against 48 LVpp with single-site RBM mutation. Related to Figure 3. (A) human NTD mAb of 4A8; human RBD mAbs of**

COVA2-15 **(B)**, BD368-2 **(C)**, S2M11 **(D)**, and REGN10933 **(E)**; mouse RBD mAbs of 3C8 **(F)**, 85F7 **(G)**, 36H6 **(H)**, and **(I)** 2B4. All mAbs were tested at 3-fold serial dilutions, related to Figure 3A.



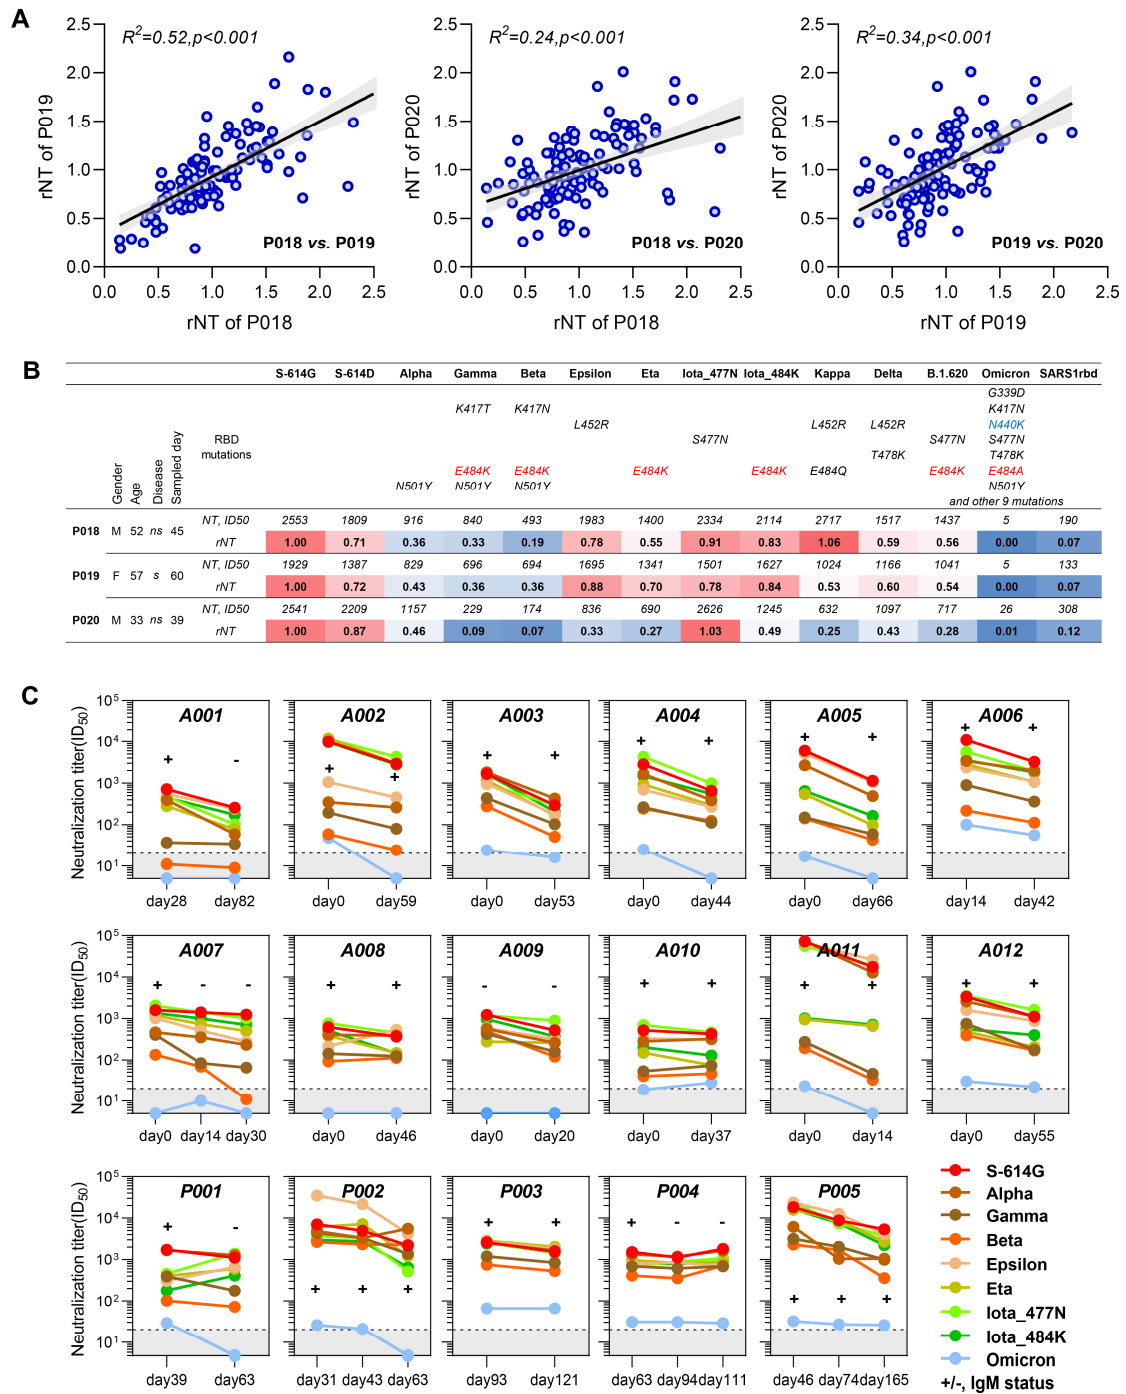

**Figure S7. Multiplexed analysis of HCPs against variants. Related to Figure 3. (A)**

Correlation analyses of the rNT against 112 single-site RBD mutants of P018 v.s P019, P018 v.s P020, and P019 vs. P020. **(B)** The cross-neutralizing profiles of P018, P019, and P020 against the VOC/VOI variants. The NT data are ID50. The rNT= the ratio of NT against variant/NT against S-614G. The color changes from red to blue indicate the decreasing rNT. RBD mutations of the VOC/VOI variants are shown in the table. All the 3 HCPs were from the patient group. 'Disease' indicated the COVID-19 severity. S, severe;

ns, non-severe. 'Sampled day' indicated the sampling day since disease onset. SARS1rbd, pseudovirus bearing a chimeric spike of SARS-CoV-2 with SARS-CoV RBD replacement.

**(C)** Longitudinal cross-neutralization profiles of HCPs from individuals (ASI) with past asymptomatic (n=12, A001 to A012) or symptomatic (n=5, P001 to P005) infections. The time points of samples are days since SARS-CoV-2 antibody seroconversion for ASIs and are days since illness onset for patients.



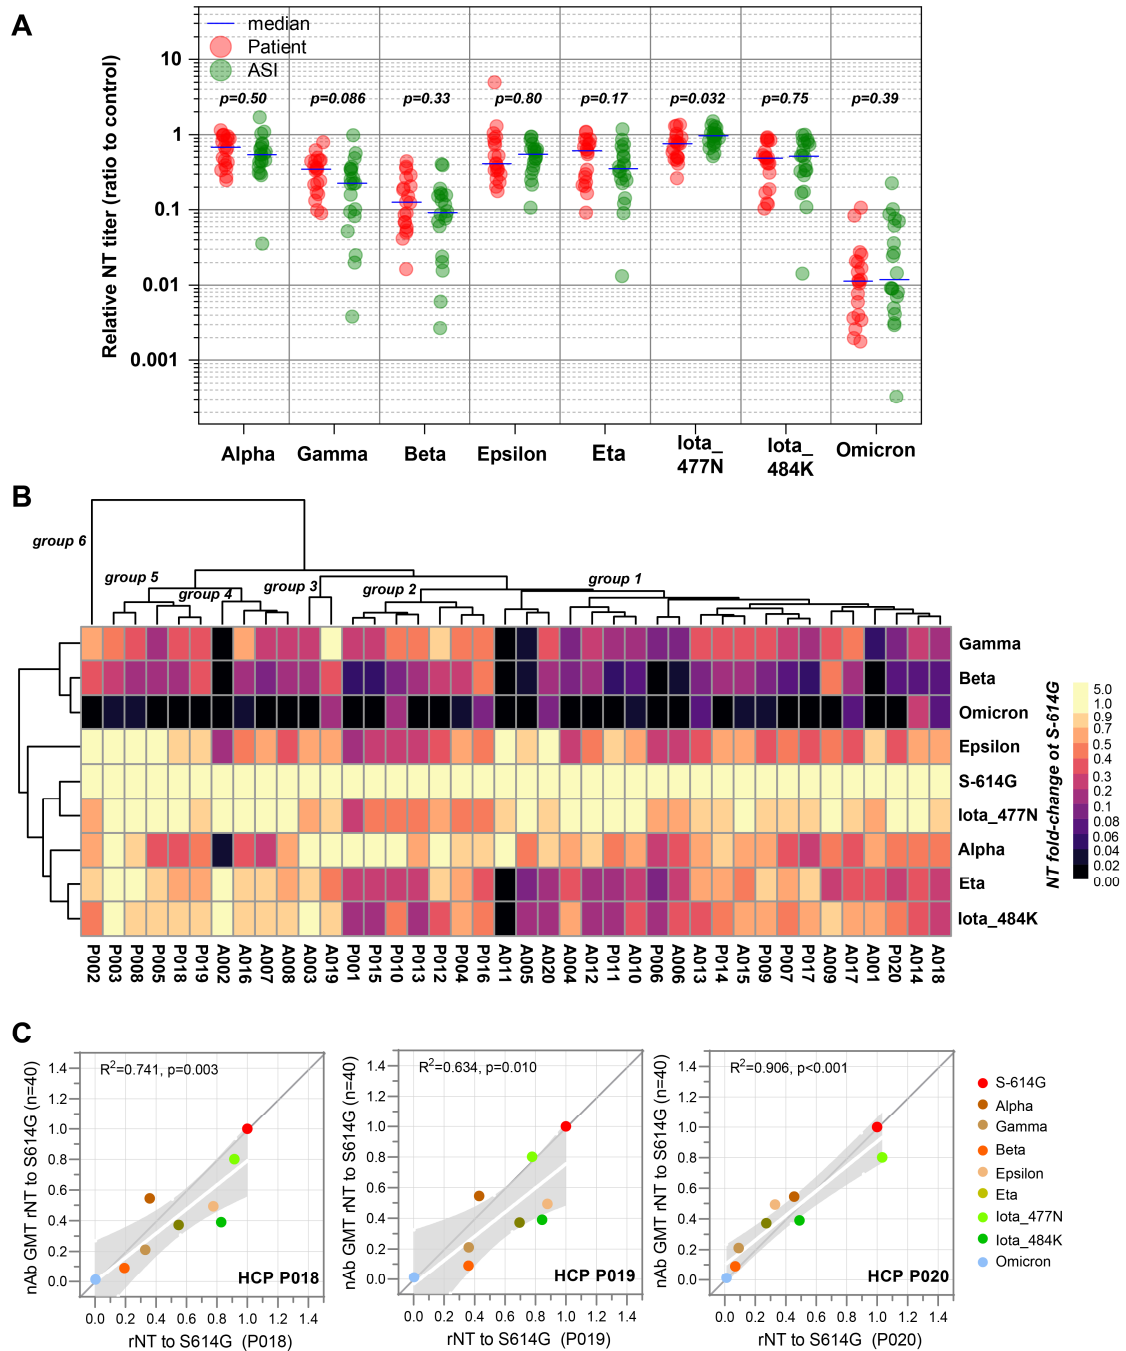

**Figure S8. Grouping HCPs by cross-neutralization patterns. Related to Figure 3. (A)** Comparisons of the rNT against VOC/VOI variants between HCPs from patients and ASI cases. **(B)** Classification of HCP samples according to their cross-neutralization profiles against VOC/VOI variants. A heatmap representation of cross-neutralization profiles of HCPs was generated based on the rNT of the sample against each variant. The groups (groups 1 to 6) of HCPs are divided by hierarchical clustering. **(C)** Correlation analyses of the cross-variants rNT of the three representative HCPs and the average level (GMT) of the total HCP cohort (n=40).

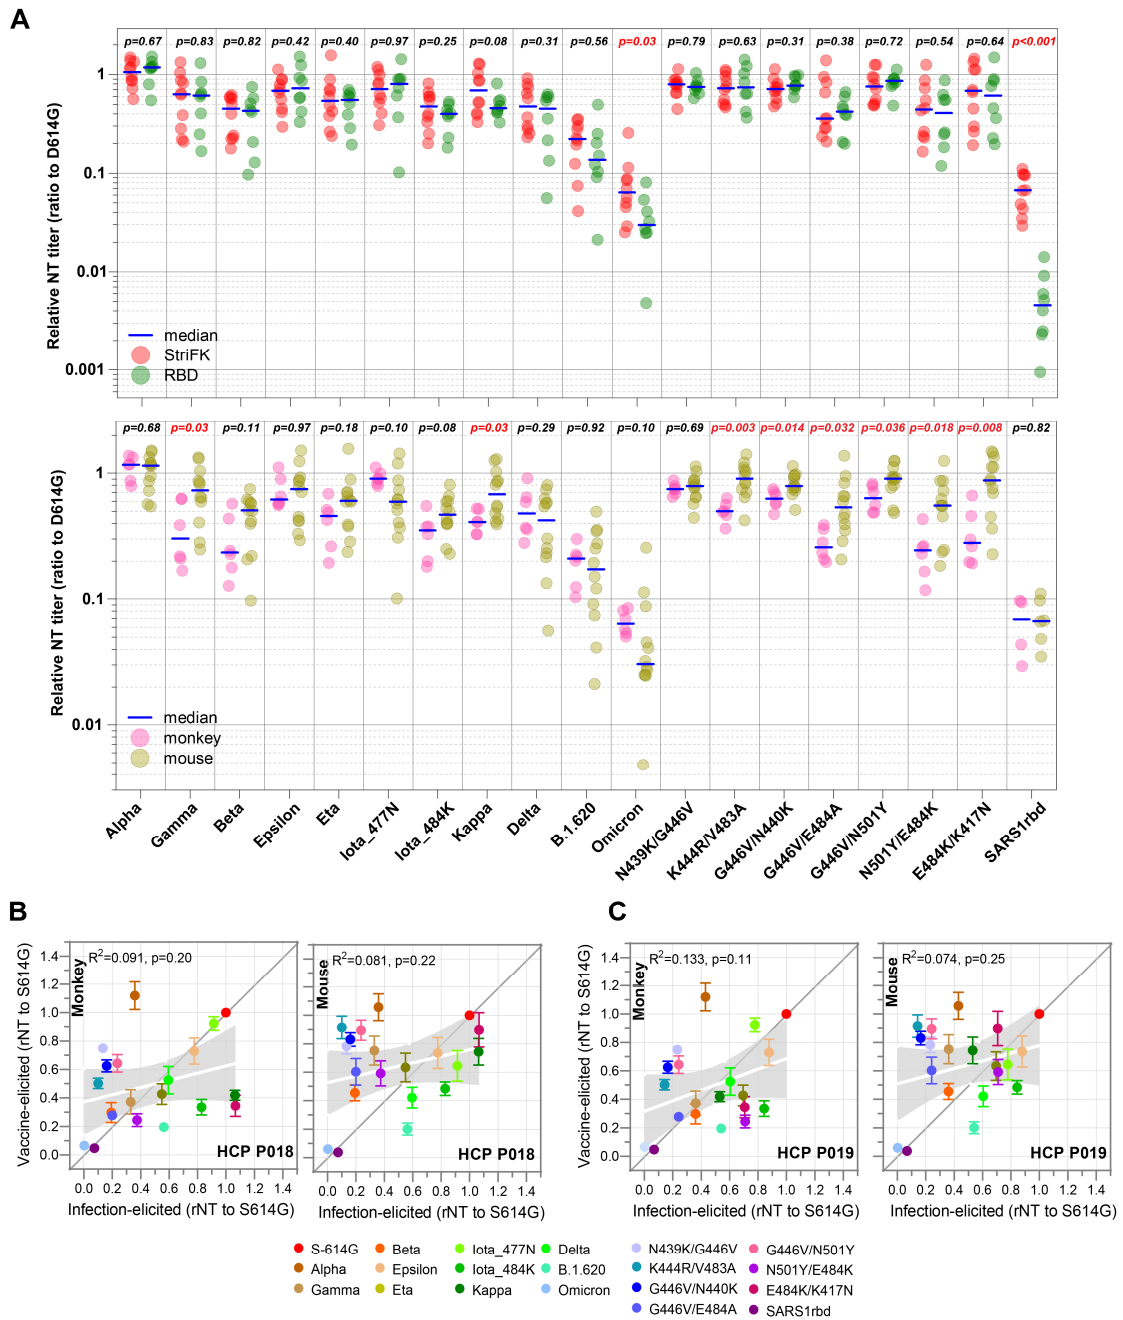

**Figure S9. Comparisons of the cross-neutralization breadth of antisera of animals received protein-based vaccines. Related to Figure 4. (A)** Difference of the rNT against variants of antisera from recombinant spike or RBD protein-based vaccine (3-shot) immunized monkeys and mice. The upper panel shows the comparison between recombinant StriFK ( $n=10$ ) and RBD ( $n=8$ ) vaccinated animals (pooled monkeys and mice). The lower panel shows the comparison between monkeys ( $n=6$ ) and mice ( $n=12$ ). For the SARS1rbd group of the lower panel, due to the significant difference between StriFK and RBD groups, only the data of the StriFK group are included for inter-animal comparison (4

monkeys v.s. 6 mice). Unpaired t-test or Mann-Whitney U test was used to compare continuous variables between two groups according to the data distribution. Comparison of the rNT of HCP P018 (**B**) or P019 (**C**) (X-axis) and spike-based vaccine-elicited animal's sera (Y-axis; left panel, in monkeys; right panel, in mice) against SARS-CoV-2 variants. For both panels (**B**) and (**C**), the data are plotted as mean $\pm$ SEM.

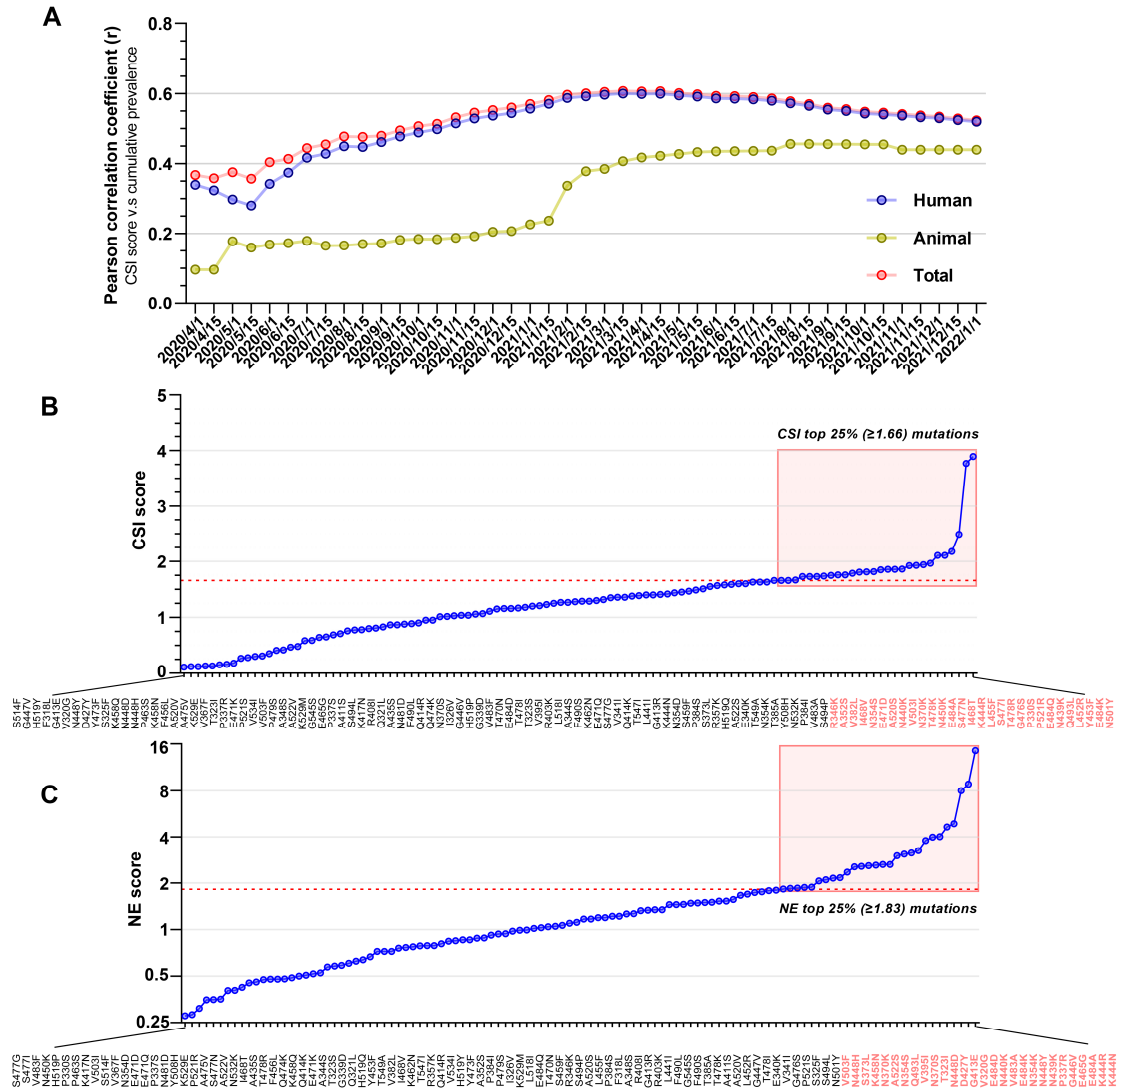

**Figure S10. The CSI and NE scores of RBD mutations. Related to Figure 5. (A)** Dynamics of the Pearson correlation coefficient ( $r$ ) between the CSI score and the cumulative prevalence of mutations in human-derived, non-human animal-derived, and total viral sequences in GISAID during the pandemic. Ranking of the CSI (**B**) and NE (**C**) scores of 112 RBD mutations. Following the statistical distributions of the two scores, the 75% percentile is 1.66 for the CSI score and is 1.83 for the NE score. Mutations with the top 25% CSI ( $\geq 1.66$ ,  $n=29$ ) or NE scores ( $\geq 1.83$ ,  $n=28$ ) are highlighted with red frames.

Table S1. Information of the ACE2 orthologs of various animals involved in the study. Related to Figure 1.

| Species                          | Abbreviation  | Sequence ID    |
|----------------------------------|---------------|----------------|
| <i>Homo sapiens</i>              | Human         | NM_021804.3    |
| <i>Macaca mulatta</i>            | Monkey        | XM_028841825.1 |
| <i>Tupaia chinensis</i>          | Tupaia        | XM_006164692.3 |
| <i>Felis catus</i>               | Cat           | NM_001039456.1 |
| <i>Puma concolor</i>             | Puma          | XM_025934632   |
| <i>Canis lupus familiaris</i>    | Dog           | NM_001165260.1 |
| <i>Mustela putorius furo</i>     | Ferret        | XM_004758886.2 |
| <i>Oryctolagus cuniculus</i>     | Rabbit        | XM_002719845.3 |
| <i>Mesocricetus auratus</i>      | Hamster       | XM_005074209.2 |
| <i>Mus musculus</i>              | Mouse         | NM_001130513.1 |
| <i>Equus przewalskii</i>         | Horse         | XM_008544773.1 |
| <i>Camelus ferus</i>             | Camel         | XM_006194201.2 |
| <i>Sus scrofa</i>                | Pig           | XM_021079374.1 |
| <i>Manis javanica</i>            | Pangolin      | XM_017650263.2 |
| <i>Rhinolophus ferrumequinum</i> | Horseshoe bat | XM_033107295.1 |
| <i>Physeter catodon</i>          | Whale         | XM_024115511.2 |
| <i>Eumetopias jubatus</i>        | Sea Lion      | XM_028115021.1 |
| <i>Salmo trutta</i>              | Brown Trout   | XM_029747397.1 |

Table S2. Characteristics of the convalescent individuals with COVID-19 disease or past asymptomatic infections (ASIs) involved in this study. Related to Figure 3.

|                                             | COVID-19 patients        | Asymptomatic infections | Total              |                    |
|---------------------------------------------|--------------------------|-------------------------|--------------------|--------------------|
| No.                                         | 20                       | 20                      | 40                 |                    |
| Gender (M/F)                                | 11/9                     | 12/8                    | 23/17              |                    |
| Age, median (range)                         | 51 (30-68)               | 50 (30-58)              | 51 (30-68)         |                    |
| Sampled at day after onset <sup>a</sup>     | 39 (14-93)               | NA                      | 39 (14-93)         |                    |
| No. with severe-to-critical disease         | 4                        | 0                       | 4                  |                    |
| No. with longitudinal samples               | 5                        | 12                      | 17                 |                    |
| Days of follow-up, median (range)           | 32 (24-119)              | 45 (14-66)              | 44 (14-119)        |                    |
| RBD-IgM seropositivity, no.(%) <sup>b</sup> | 15 (75%)                 | 13 (65%)                | 28 (70%)           |                    |
| RBD-IgG seropositivity, no.(%) <sup>b</sup> | 20 (100%)                | 20 (100%)               | 40 (100%)          |                    |
| NT to S-614G                                | Level, log <sub>10</sub> | 3.70±0.39               | 3.08±0.77          | 3.41±0.68          |
|                                             | Reference <sup>c</sup>   | 1.0                     | 1.0                | 1.0                |
| NT to Alpha                                 | Level, log <sub>10</sub> | 3.54±0.34               | 2.64±0.82          | 3.24±0.71          |
|                                             | Fold change <sup>d</sup> | 0.68 (0.25-1.14)        | 0.54 (0.035-1.70)  | 0.57 (0.035-1.70)  |
| NT to Gamma                                 | Level, log <sub>10</sub> | 3.16±0.36               | 2.23±0.55          | 2.74±0.65          |
|                                             | Fold change <sup>d</sup> | 0.35 (0.09-0.80)        | 0.23 (0.004-0.97)  | 0.26 (0.004-0.97)  |
| NT to Beta                                  | Level, log <sub>10</sub> | 2.74±0.43               | 2.05±0.62          | 2.41±0.68          |
|                                             | Fold change <sup>d</sup> | 0.13 (0.016-0.44)       | 0.09 (0.003-0.40)  | 0.11 (0.003-0.44)  |
| NT to Epsilon                               | Level, log <sub>10</sub> | 3.35±0.54               | 2.80±0.78          | 3.03±0.74          |
|                                             | Fold change <sup>d</sup> | 0.41 (0.18-4.95)        | 0.55 (0.11-0.94)   | 0.50 (0.11-4.95)   |
| NT to Eta                                   | Level, log <sub>10</sub> | 3.21±0.40               | 2.51±0.67          | 3.01±0.68          |
|                                             | Fold change <sup>d</sup> | 0.61 (0.09-1.10)        | 0.35 (0.013-1.18)  | 0.40 (0.013-1.18)  |
| NT to Iota_477N                             | Level, log <sub>10</sub> | 3.45±0.47               | 2.98±0.77          | 3.34±0.68          |
|                                             | Fold change <sup>d</sup> | 0.75 (0.26-1.36)        | 0.96 (0.52-1.52)   | 0.82 (0.26-1.52)   |
| NT to Iota_484K                             | Level, log <sub>10</sub> | 3.29±0.43               | 2.73±0.68          | 3.10±0.65          |
|                                             | Fold change <sup>d</sup> | 0.49 (0.10-0.93)        | 0.51 (0.014-1.00)  | 0.49 (0.014-1.00)  |
| NT to Omicron                               | Level, log <sub>10</sub> | 1.75±0.51               | 1.32±0.51          | 1.44±0.55          |
|                                             | Fold change <sup>d</sup> | 0.01 (0.002-0.11)       | 0.01 (0.0003-0.23) | 0.01 (0.0003-0.23) |

<sup>a</sup> It is the first sampling time after illness onset. <sup>b</sup> Serological status of RBD-IgM/IgG for the 1<sup>st</sup> sample of each case. <sup>c</sup> The NT of each HCP sample against the S-614G is regarded as the reference. <sup>d</sup> Indicating the fold changes of NT to a variant in comparison with that to S-614G control. The data of NT level is expressed as median±SD. The fold-change of NT to VOCs is median (range).

Table S3. Multivariate analysis of the effects of RBD mutations for the cross-species breakout potentials and on the neutralization escape to representative HCPs in associating with their cumulative frequencies at different time points. Related to Figure 5.

|                             | To cumulative frequencies of mutations, $\beta$ (p value) |                 |                 |
|-----------------------------|-----------------------------------------------------------|-----------------|-----------------|
|                             | in humans                                                 | in animals      | in total        |
| By January 1, 2022          |                                                           |                 |                 |
| rNT of HCP P018             | -0.083 (0.79)                                             | 0.057 (0.80)    | -0.054 (0.86)   |
| rNT of HCP P019             | 0.328 (0.45)                                              | -0.032 (0.92)   | 0.311 (0.48)    |
| rNT of HCP P020             | -0.253 (0.46)                                             | -0.142 (0.56)   | -0.267 (0.43)   |
| Infectivity in huACE2 cells | -0.019 (0.94)                                             | -0.193 (0.32)   | -0.024 (0.93)   |
| Infectivity in feACE2 cells | 0.712 (0.0002)                                            | 0.540 (<0.0001) | 0.721 (0.0001)  |
| Infectivity in muACE2 cells | 0.037 (0.0021)                                            | 0.021 (0.013)   | 0.037 (0.002)   |
| By July 1, 2021             |                                                           |                 |                 |
| rNT of HCP P018             | -0.070 (0.80)                                             | 0.076 (0.72)    | -0.007 (0.98)   |
| rNT of HCP P019             | 0.241 (0.54)                                              | -0.058 (0.84)   | 0.200 (0.60)    |
| rNT of HCP P020             | 0.018 (0.95)                                              | -0.082 (0.72)   | -0.012 (0.97)   |
| Infectivity in huACE2 cells | 0.010 (0.97)                                              | -0.254 (0.16)   | 0.004 (0.99)    |
| Infectivity in feACE2 cells | 0.737 (<0.0001)                                           | 0.510 (<0.0001) | 0.751 (<0.0001) |
| Infectivity in muACE2 cells | 0.043 (<0.0001)                                           | 0.022 (0.0064)  | 0.043 (<0.0001) |
| By January 1, 2021          |                                                           |                 |                 |
| rNT of HCP P018             | -0.089 (0.73)                                             | 0.032 (0.87)    | -0.008 (0.97)   |
| rNT of HCP P019             | 0.025 (0.94)                                              | -0.025 (0.93)   | -0.015 (0.97)   |
| rNT of HCP P020             | 0.285 (0.31)                                              | 0.105 (0.64)    | 0.244 (0.37)    |
| Infectivity in huACE2 cells | 0.029 (0.89)                                              | -0.284 (0.10)   | 0.031 (0.89)    |
| Infectivity in feACE2 cells | 0.697 (<0.0001)                                           | 0.424 (0.0005)  | 0.717 (<0.0001) |
| Infectivity in muACE2 cells | 0.030 (0.002)                                             | -0.008 (0.33)   | 0.030 (0.002)   |
| By July 1, 2020             |                                                           |                 |                 |
| rNT of HCP P018             | -0.137 (0.53)                                             | 0.015 (0.92)    | 0.029 (0.89)    |
| rNT of HCP P019             | 0.202 (0.51)                                              | 0.026 (0.90)    | 0.108 (0.70)    |
| rNT of HCP P020             | 0.161 (0.50)                                              | 0.084 (0.60)    | 0.082 (0.71)    |
| Infectivity in huACE2 cells | -0.179 (0.34)                                             | -0.191 (0.13)   | -0.163 (0.35)   |
| Infectivity in feACE2 cells | 0.493 (0.0002)                                            | 0.244 (0.005)   | 0.525 (<0.0001) |
| Infectivity in muACE2 cells | 0.011 (0.18)                                              | -0.004 (0.42)   | 0.010 (0.18)    |
